# Supplementary material for: Zonation of the Vitis vinifera microbiome in Vino Nobile di Montepulciano PDO production area
Source: PubMed Central journal article supplement (PMC11628622; doi:10.1038/s42003-024-07261-8), 2024-12-09
Supplement: 42003_2024_7261_MOESM1_ESM.pdf [file 42003_2024_7261_MOESM1_ESM.pdf]

# **Zonation of the *Vitis vinifera* microbiome in Vino Nobile di Montepulciano PDO production area**

Giorgia Palladino, Enrico Nanetti, Daniel Scicchitano, Nicolò Cinti, Lucia Foresto, Alice Cozzi, Antonio Gonzalez Vara Rodriguez, Nicolò Interino, Jessica Fiori, Silvia Turrone, Marco Candela, Simone Rampelli

*Supplementary Information*

**A)**

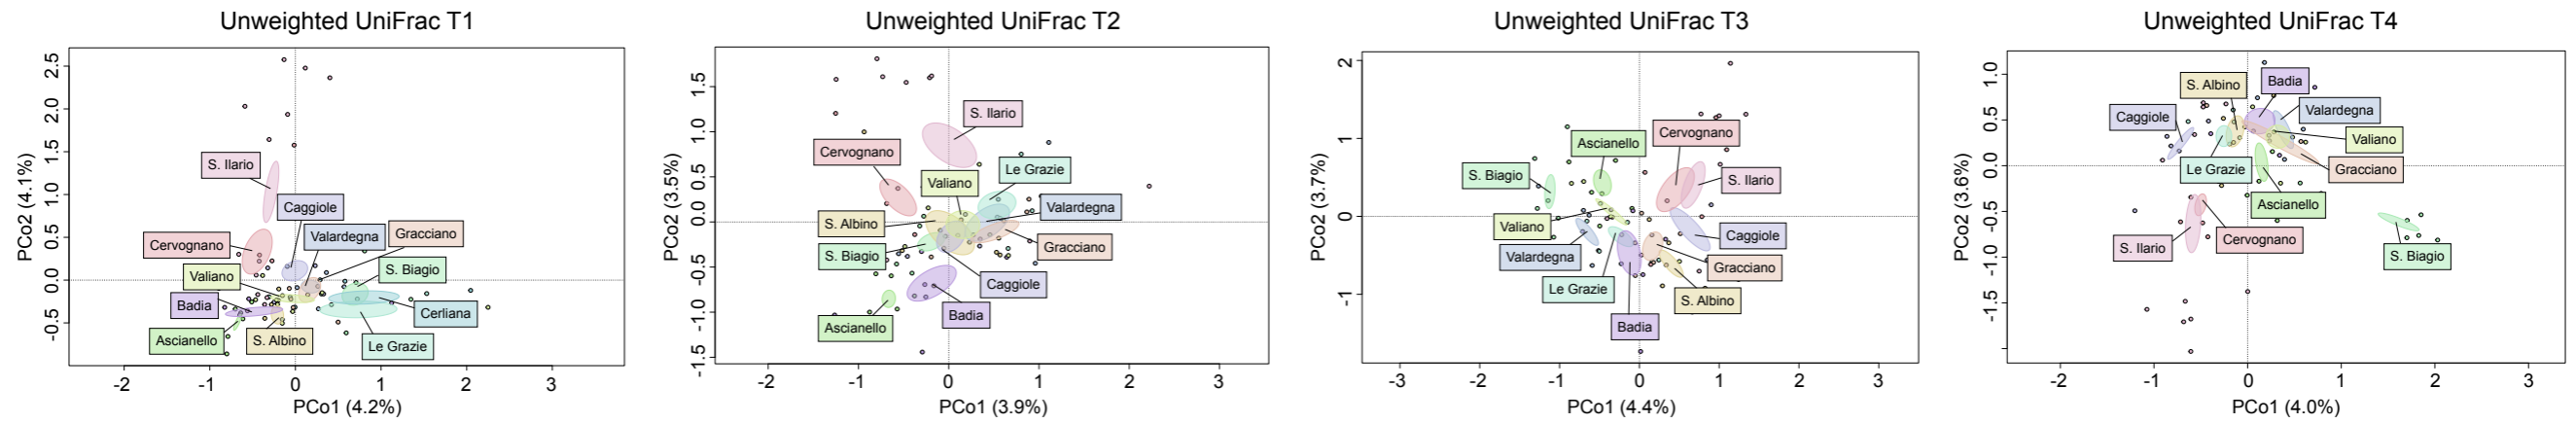

**B)**

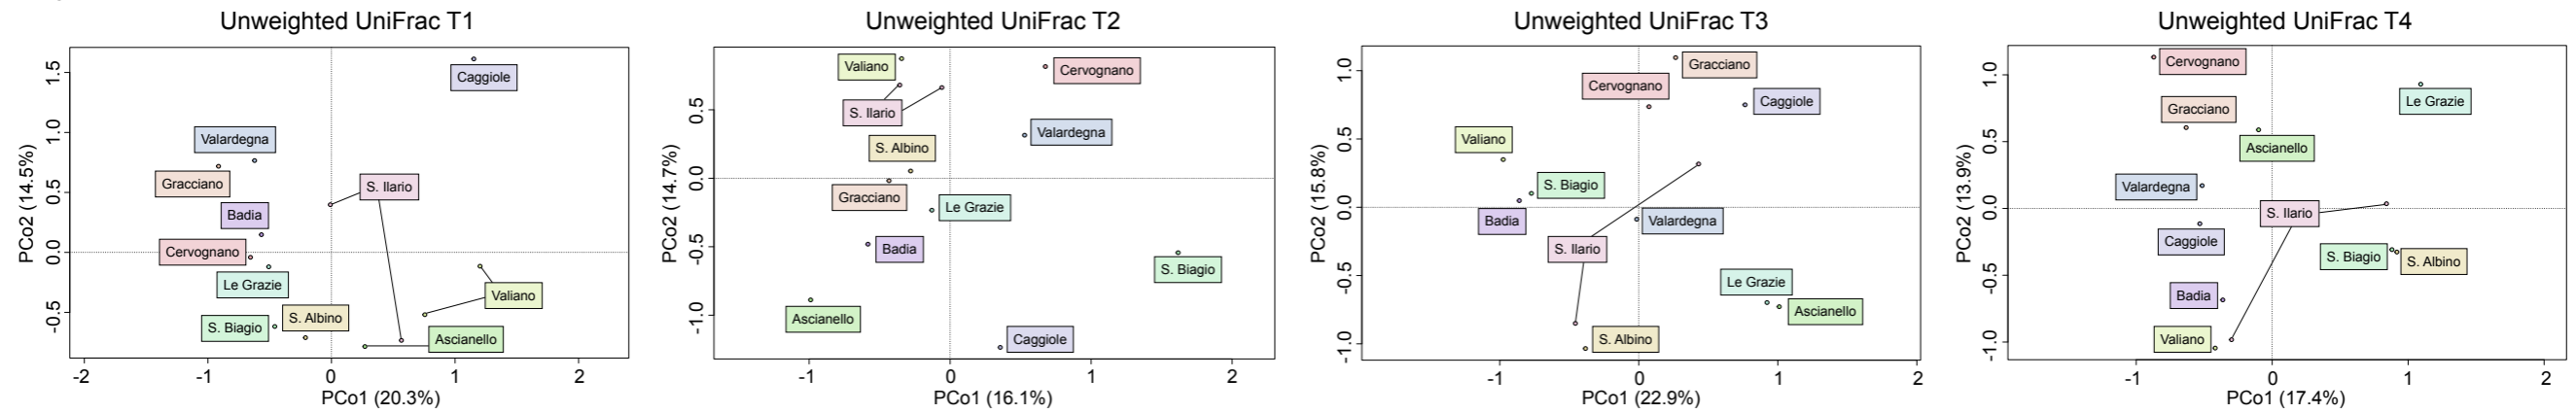

**Supplementary Figure 1 - Comparison of bacterial and fungal composition of rhizospheric soil samples of Montepulciano AGUs (Additional Geographical Units) across time points (T1 to T4).** (A) Principal Coordinate Analysis (PCoA) based on unweighted UniFrac distances showing the variations of *Vitis vinifera* rhizospheric soil bacterial composition in the different AGUs and time points. Procrustes test between time points, p-value = 0.005. (B) Principal Coordinate Analysis (PCoA) based on unweighted UniFrac distances showing the variations of *Vitis vinifera* rhizospheric soil fungal composition in the different AGUs and time points. Procrustes test between time points, p-value = 0.01. The first and second principal components are plotted and the percentage of variance in the dataset explained by each axis is highlighted.

**A)**

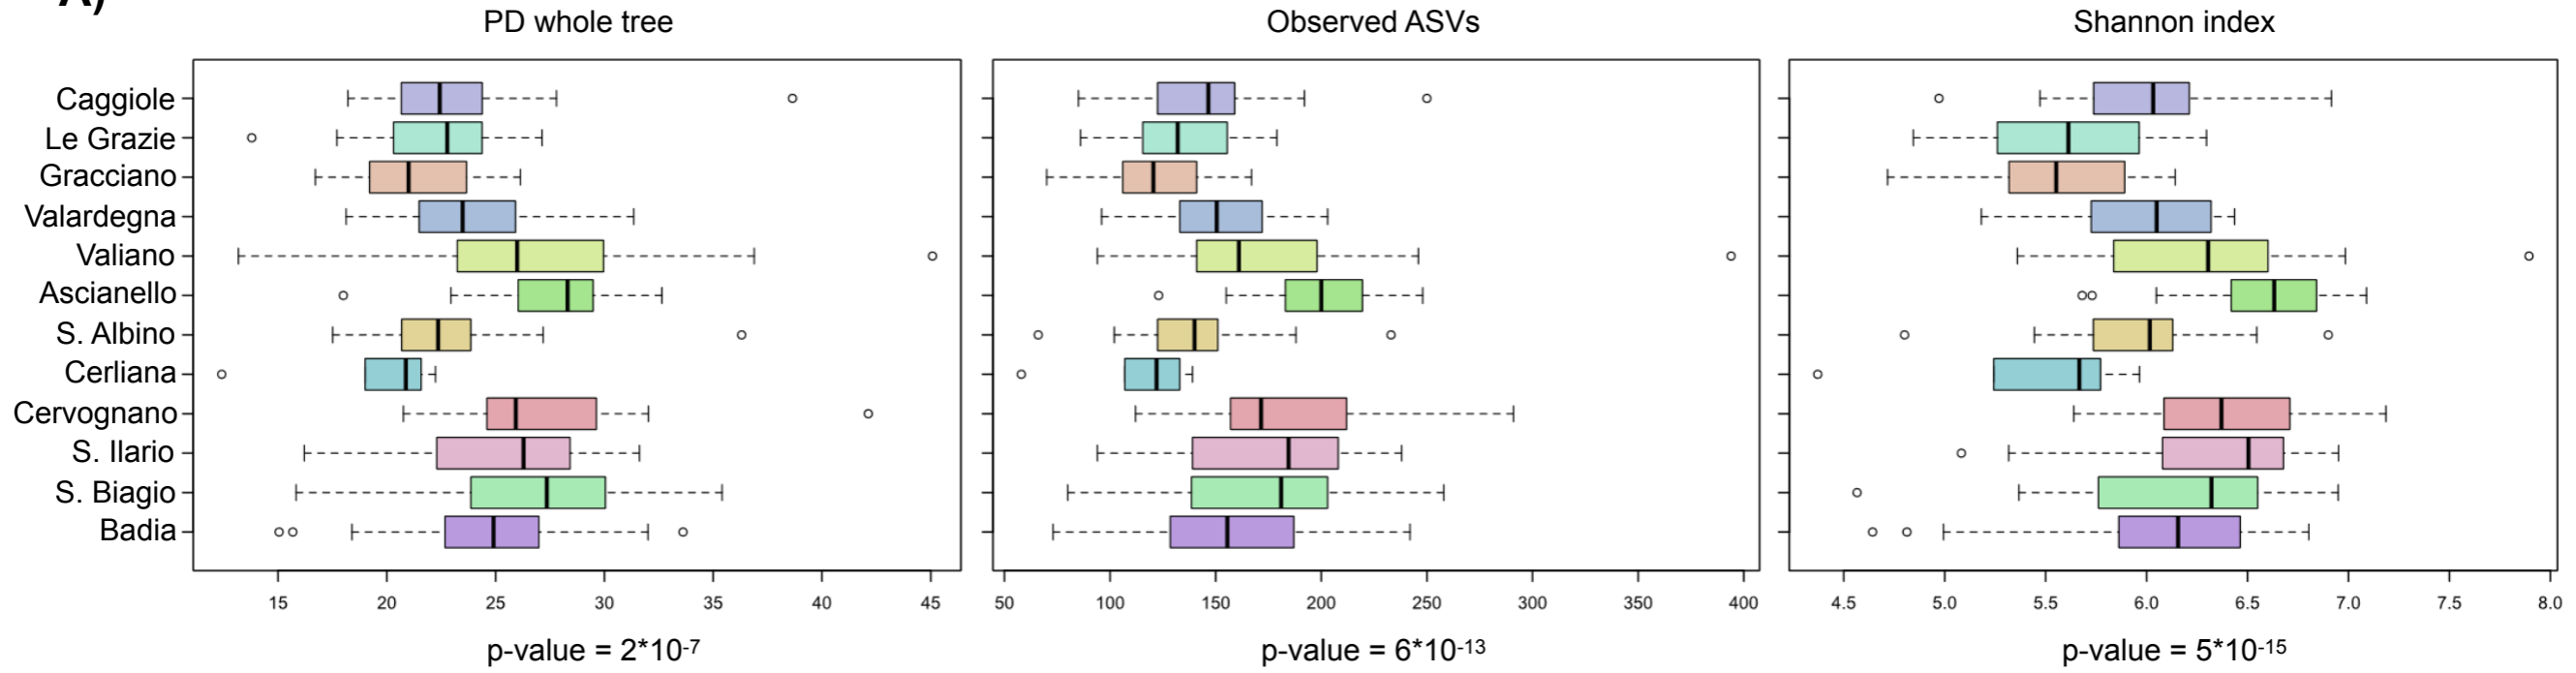

**B)**

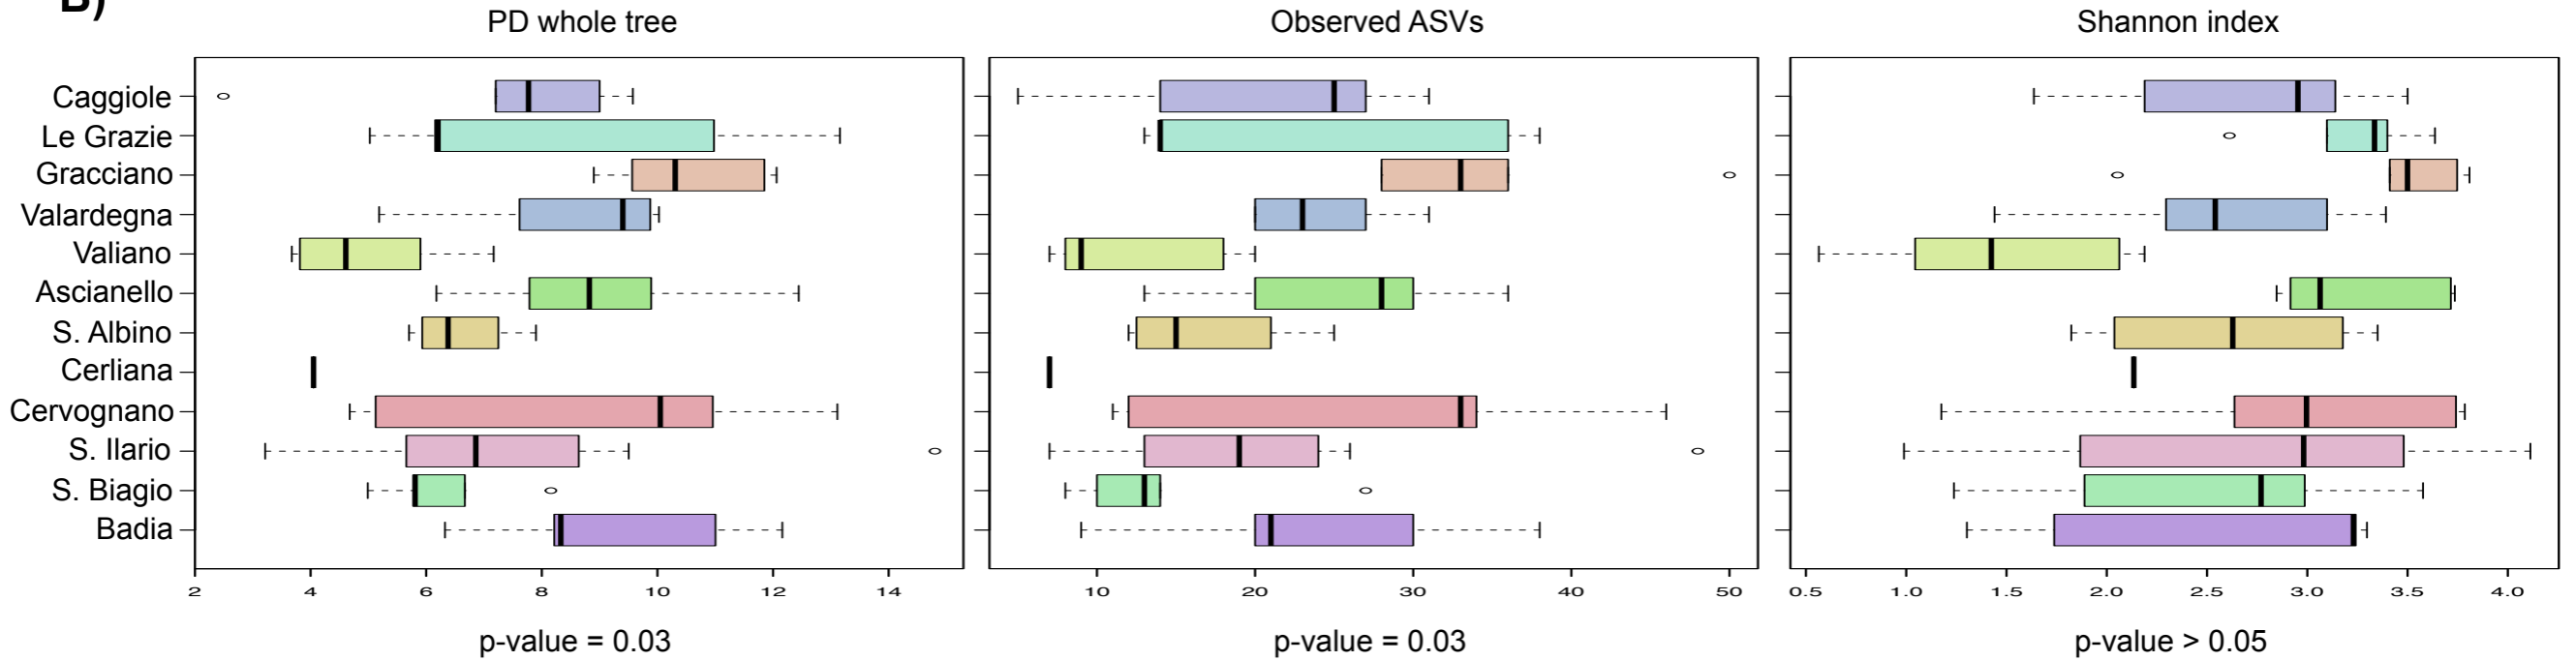

**Supplementary Figure 2 - Diversity of microbial communities across Montepulciano AGUs (Additional Geographical Units).** Boxplots showing the alpha-diversity distributions of the microbiome associated with samples from different AGUs for bacterial (A) and fungal (B) communities, based on the Faith's phylogenetic diversity (PD whole tree), the number of observed amplicon sequence variants (ASVs), and the Shannon index. Significant differences between AGUs are indicated below each graph (Kruskal-Wallis test).

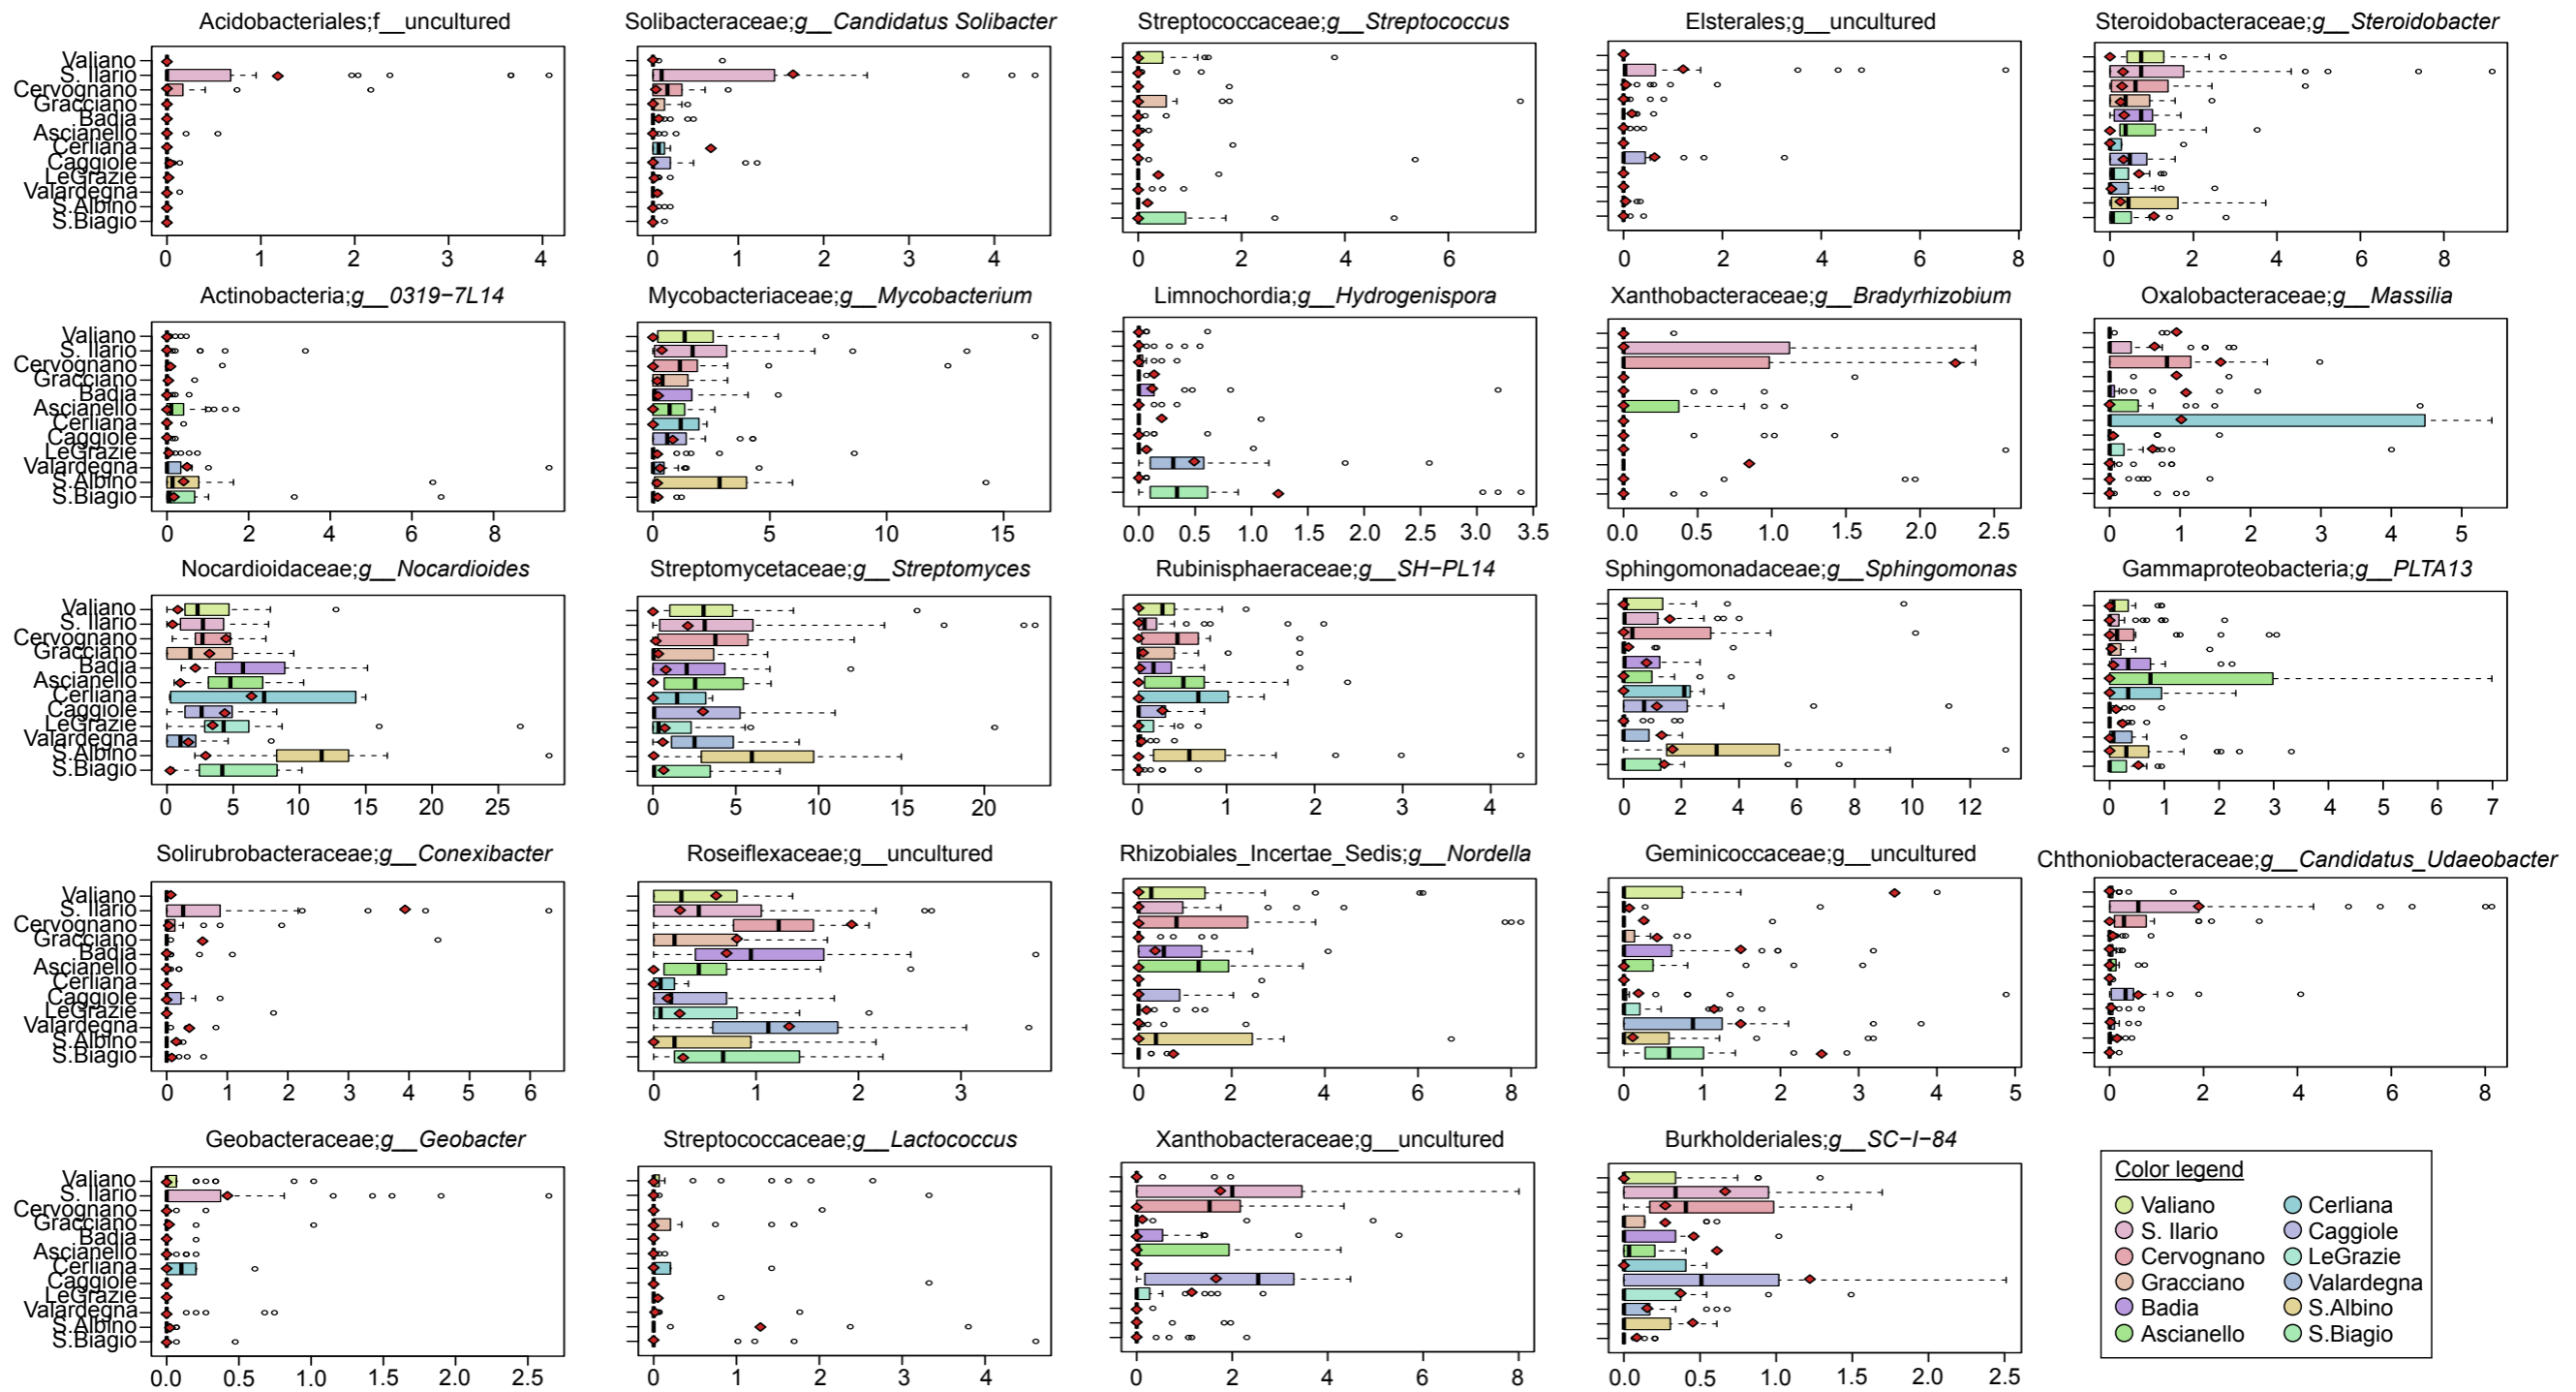

**Supplementary Figure 3 - Relative abundance of the 24 bacterial taxa that discriminate among Additional Geographical Units (AGUs).** The relative abundance distribution of the discriminant bacterial taxa in the rhizosphere is represented in each boxplot, whereas the mean relative abundance of the same taxa in the respective soil samples is represented with a red rhombus. Significant variations in relative abundance were assessed by Kruskal-Wallis test controlled for multiple testing using False Discovery Rate (FDR) ( $p$ -value  $\leq 0.001$  for all taxa). AGUs are reported in the first column of boxplots and in the color legend at the bottom right.

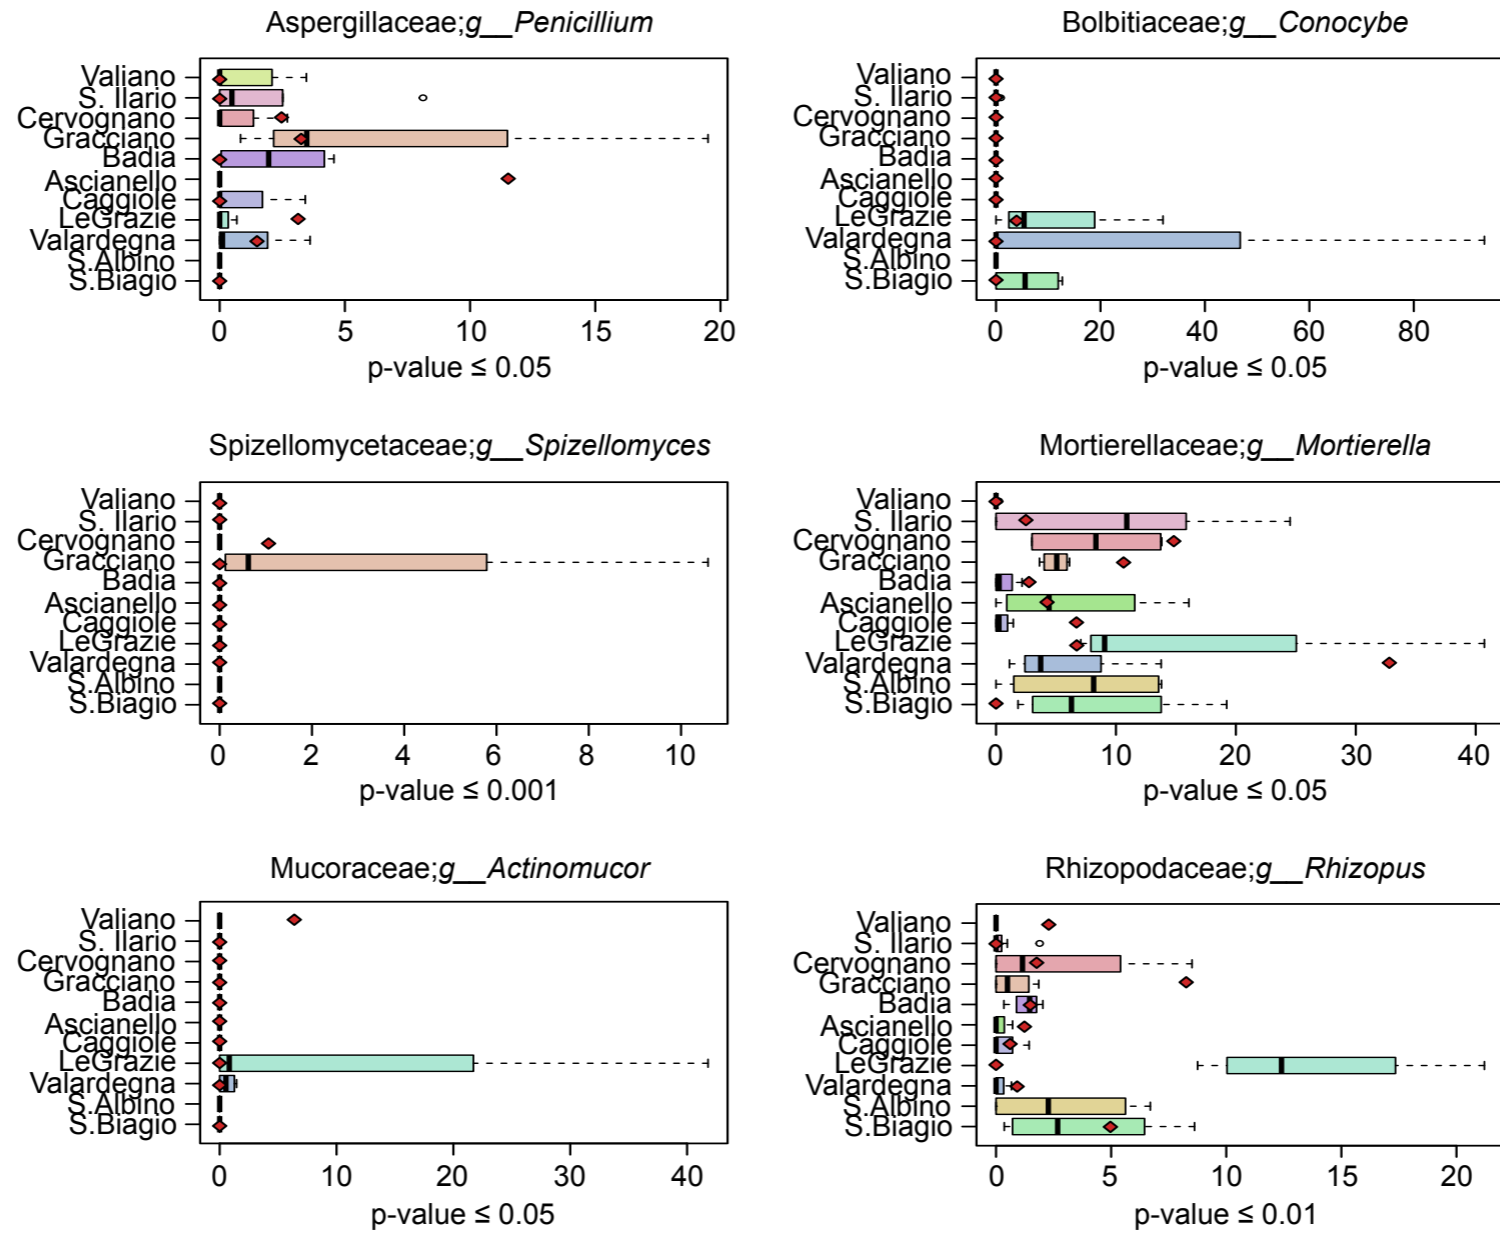

**Supplementary Figure 4 - Relative abundance of the 6 fungal taxa that discriminate among Additional Geographic Units - AGUs.** The relative abundance distribution of the discriminant fungal taxa in the rhizosphere is represented in each boxplot, whereas the mean relative abundance of the same taxa in the respective soil samples is represented with a red rhombus. Significant variations in relative abundance were assessed by Kruskal-Wallis test controlled for multiple testing using False Discovery Rate (FDR) (p-values are reported below each boxplot). AGUs are indicated next to each boxplot.

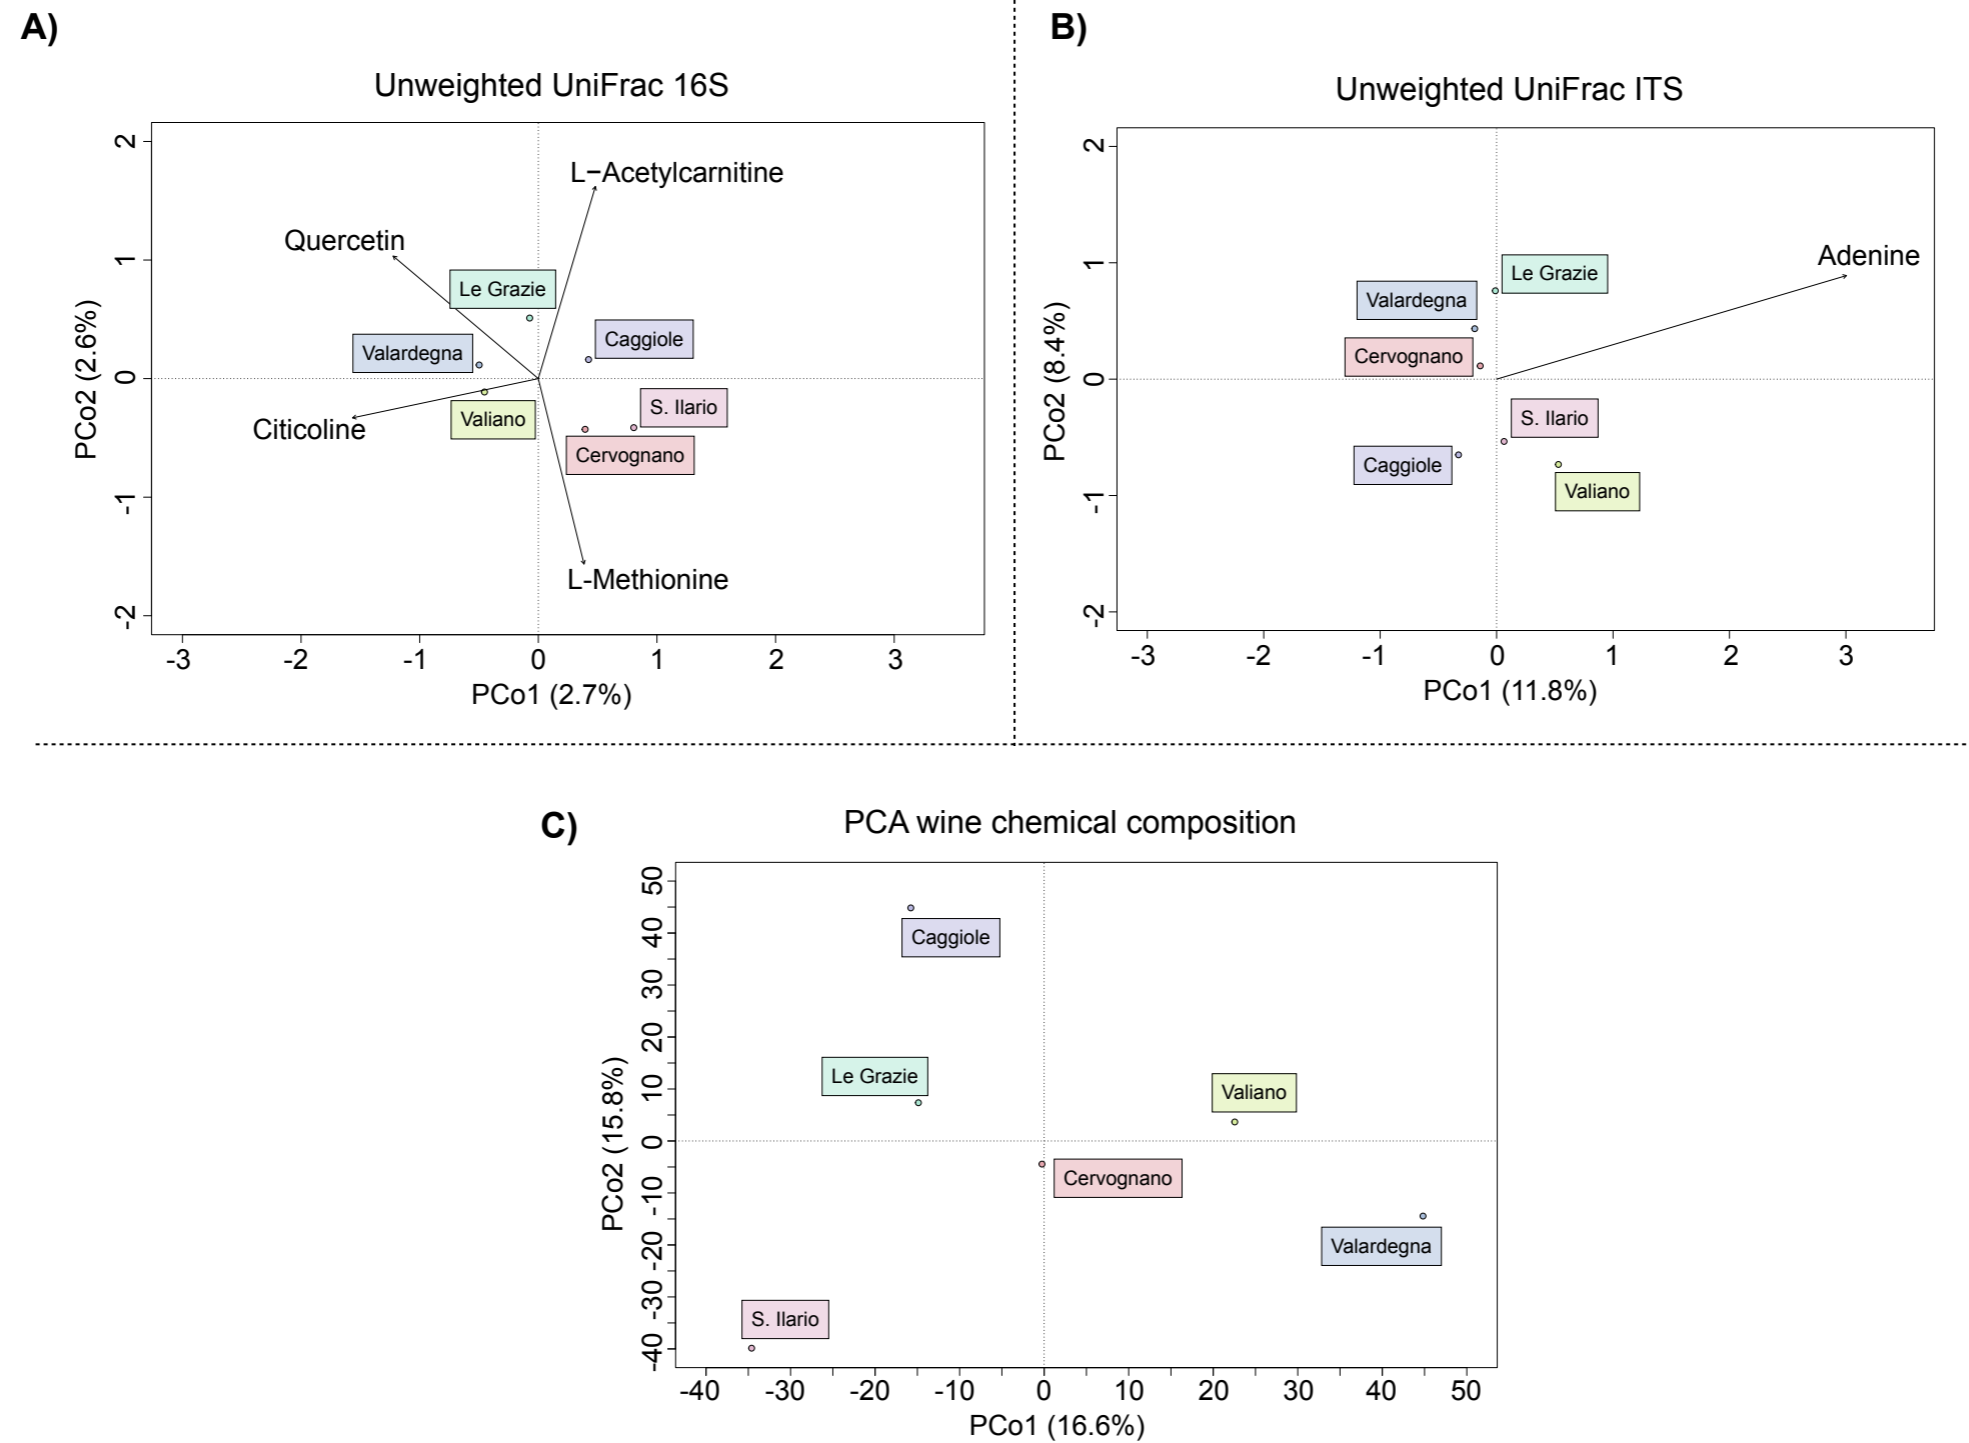

**Supplementary Figure 5 - Impact of wine chemical composition on rhizospheric microbial communities of Montepulciano AGUs (Additional Geographical Units).** Principal Coordinate Analysis (PCoA) based on unweighted UniFrac distances between bacterial (A) and fungal (B) profiles of *Vitis vinifera* cultivar Sangiovese rhizospheres in the different Additional Geographical Units (AGUs) of the Montepulciano territory. Only the six AGUs selected for wine chemical composition are shown. Superimposition of wine analytical components through the envfit function are shown ( $p$ -values  $\leq 0.05$ ). (C) Principal Component Analysis of wine analytical components in the six selected AGUs. In all graphs, the first and second principal components are plotted and the percentage of variance in the dataset explained by each axis is highlighted.

**Supplementary Table 1 - Site and plant characteristics of all vineyards in the Montepulciano consortium.** Additional Geographic Units (AGUs) are given in the first column. Plant age is given in years (y), altitude in meters above sea level (masl), and soil composition in percentage of soil type (gravel, sand, silt and clay). Soil composition was retrieved by Costantini et al. (2021). "--", no information available.

| AGU        | Vineyard                  | Plant age (y) | Rootstock                 | Rootstock type                               | Clone family          | Agronomical practice | Management   | Latitude    | Longitude   | Altitude (masl) | Soil composition (%) |      |      |      |
|------------|---------------------------|---------------|---------------------------|----------------------------------------------|-----------------------|----------------------|--------------|-------------|-------------|-----------------|----------------------|------|------|------|
|            |                           |               |                           |                                              |                       |                      |              |             |             |                 | Gravel               | Sand | Silt | Clay |
| Valiano    | Tenuta Tre Rose           | >15           | 420 A - Gravesac          | Berlanderi x Riparia                         | CG5 - CV20            | Plow sole            | Biological   | 43.16022892 | 11.93597164 | 337             | 5                    | 47   | 29   | 24   |
|            | Palazzo Vecchio           | >15           | 1103P, 110R, 775P         | Berlanderi x Rupestris                       | VCR                   | Partial grassing     | Conventional | 43.1657283  | 11.90092418 | 320             | 5                    | 47   | 29   | 24   |
| Cervognano | Boscarelli                | >15           | 1103, 110R, 420A          | Berlanderi x Rupestris                       | CH20                  | Partial grassing     | Integrated   | 43.10599529 | 11.85076717 | 301             | 9                    | 42   | 36   | 22   |
| Cerliana   | La Ciarliana              | >15           | 420A                      | Berlanderi x Riparia                         | R                     | Plow sole            | Conventional | 43.11531862 | 11.81196374 | 340             | 9                    | 42   | 36   | 22   |
| S. Albino  | Fattoria del Cerro        | >15           | K5BB                      | Berlanderi x Riparia                         | CH20                  | Plow sole            | Integrated   | 43.07135327 | 11.80867656 | 470             | 9                    | 42   | 36   | 22   |
| Valardegna | Salcheto                  | >15           | 1103P                     | Berlanderi x Rupestris                       | Prugnolo Grifo/Bravio | Partial grassing     | Biological   | 43.08663725 | 11.80031461 | 422             | 9                    | 42   | 36   | 22   |
| S. Biagio  | Le Bertille               | >15           | --                        | --                                           | --                    | --                   | --           | 43.10096085 | 11.76677398 | 380             | 9                    | 42   | 36   | 22   |
| S. Ilario  | Podere Casanova           | >15           | 3309C                     | Riparia x Rupestris                          | R                     | Grassing             | Biological   | 43.07415305 | 11.89457831 | 260             | 10                   | 77   | 14   | 9    |
|            | Bindella                  | >15           | 110R                      | Berlanderi x Rupestris                       | VCR                   | Partial grassing     | Integrated   | 43.09568433 | 11.86674385 | 310             | 9                    | 42   | 36   | 22   |
| Le Grazie  | Fattoria della Talosa     | >15           | 110R                      | Berlanderi x Rupestris                       | G76                   | Partial grassing     | Biological   | 43.11157039 | 11.78225739 | 410             | 9                    | 42   | 36   | 22   |
| Ascianello | De' Ricci                 | >15           | 1103P, K5BB               | Berlanderi x Rupestris, Berlanderi x Riparia | CH20                  | Partial grassing     | Biological   | 43.140338   | 11.791788   | 350             | 9                    | 42   | 36   | 22   |
| Gracciano  | Fattoria Svetoni          | >15           | --                        | --                                           | --                    | Partial grassing     | Biological   | 43.13461785 | 11.8367263  | 280             | 10                   | 77   | 14   | 9    |
| Caggiolo   | Azienda agricola Tiberini | >15           | 1103P, 110R, 140R, 157.11 | Berlanderi x Rupestris, Berlanderi x Riparia | SG                    | Partial grassing     | Biological   | 43.12371226 | 11.80025501 | 310             | 9                    | 42   | 36   | 22   |
| Badia      | Avignonesi                | >15           | --                        | --                                           | --                    | --                   | Biodynamic   | 43.157433   | 11.81136    | 280             | 9                    | 42   | 36   | 22   |

**Supplementary Table 2 - Chemical soil properties in the vineyards from different AGUs.** Abbreviations: N = nitrogen, P = phosphorous, K = potassium, Hum = humidity, EC = electrical conductivity,

Temp = temperature

| AGU               | N (mg/Kg) | P (mg/Kg) | K (mg/Kg) | pH   | Hum (%) | EC  | Temp °C |
|-------------------|-----------|-----------|-----------|------|---------|-----|---------|
| <i>S. Ilario</i>  | 6         | 9         | 18        | 8.10 | 14.23   | 91  | 24.6    |
| <i>Ascianello</i> | 27        | 37        | 75        | 6.73 | 20      | 375 | 21.2    |
| <i>Badia</i>      | 12        | 17        | 37        | 6.72 | 13      | 171 | 24.1    |
| <i>Caggiolo</i>   | 6         | 9         | 19        | 6.63 | 15      | 97  | 17.5    |
| <i>Cerliana</i>   | 1         | 1         | 3         | 6.72 | 18.4    | 15  | 24.1    |
| <i>Cervognano</i> | NA        | NA        | NA        | NA   | NA      | NA  | NA      |
| <i>Gracciano</i>  | 12        | 17        | 36        | 8.25 | 13.2    | 177 | 24.3    |
| <i>Le Grazie</i>  | 10        | 14        | 30        | 6.42 | 15.7    | 143 | 17.6    |
| <i>S.Albino</i>   | 10        | 14        | 30        | 7.44 | 15.44   | 149 | 22.1    |
| <i>S.Biagio</i>   | 42        | 59        | 119       | 6.67 | 17.4    | 596 | 29.6    |
| <i>Valardegna</i> | 10        | 15        | 31        | 8.45 | 14.60   | 150 | 23.6    |
| <i>Valiano</i>    | NA        | NA        | NA        | NA   | NA      | NA  | NA      |



**Supplementary Table 3 - Functional plant growth-promoting (PGP) profile of the rhizosphere and soil microbiome of Additional Geographic Units (AGUs).** Abundance of PGP functions identified in the rhizosphere and bulk soil samples of different AGUs using a read-mapping approach. Data were normalized in copies per million ((reads count for an enzyme in a given sample/(gene length/1000))/(n° reads per sample/10<sup>6</sup>).

| AGU                      | Valardegna  |            | S.Biagio    |            | LeGrazie    |            | Badia       |            | Ascianello  |            |
|--------------------------|-------------|------------|-------------|------------|-------------|------------|-------------|------------|-------------|------------|
| Vineyard                 | Salcheto    |            | Bertille    |            | Talosa      |            | Avignonesi  |            | DeRicci     |            |
| Ecosystem                | Rhizosphere | Bulk soil  | Rhizosphere | Bulk soil  | Rhizosphere | Bulk soil  | Rhizosphere | Bulk soil  | Rhizosphere | Bulk soil  |
| N fixation               | 253.33244   | 253.56081  | 247.72462   | 248.112129 | 251.914698  | 242.144023 | 246.841611  | 245.896123 | 272.236875  | 255.770062 |
| P solubilization         | 519.693471  | 513.847621 | 517.117393  | 469.877291 | 539.80944   | 520.801887 | 541.353565  | 525.087623 | 502.753704  | 477.580141 |
| Siderophore production   | 117.709424  | 102.601028 | 95.1561947  | 86.858134  | 83.7740471  | 89.4248764 | 106.68441   | 116.10761  | 136.425328  | 133.276813 |
| IAA production           | 485.630976  | 451.86668  | 494.393106  | 376.625372 | 504.947659  | 474.766202 | 492.37769   | 494.630377 | 484.131827  | 458.895643 |
| ACC deaminase production | 23.007601   | 22.7278197 | 21.6513326  | 19.5976165 | 22.9139776  | 24.6880899 | 21.4839648  | 18.7107619 | 18.0837785  | 20.6455929 |

| AGU                      | S.Albino    |            | Valiano        |            |             |            | Cerliana    |            | Gracciano   |            |
|--------------------------|-------------|------------|----------------|------------|-------------|------------|-------------|------------|-------------|------------|
| Vineyard                 | Cerro       |            | PalazzoVecchio |            | TreRose     |            | Ciarliana   |            | Svetoni     |            |
| Ecosystem                | Rhizosphere | Bulk soil  | Rhizosphere    | Bulk soil  | Rhizosphere | Bulk soil  | Rhizosphere | Bulk soil  | Rhizosphere | Bulk soil  |
| N fixation               | 245.161867  | 237.297965 | 261.4787       | 258.75021  | 247.017013  | 289.026902 | 267.87289   | 231.754579 | 270.074223  | 266.946281 |
| P solubilization         | 504.167645  | 427.029998 | 462.810473     | 507.034069 | 490.230313  | 499.636566 | 525.466851  | 421.721006 | 534.439308  | 530.437528 |
| Siderophore production   | 92.5650446  | 86.6199499 | 145.151287     | 104.084526 | 107.48817   | 119.575935 | 108.305706  | 93.9227997 | 100.63267   | 130.501276 |
| IAA production           | 485.80206   | 414.209339 | 461.286801     | 448.963185 | 439.289388  | 478.49473  | 559.174905  | 414.594039 | 527.122714  | 481.003453 |
| ACC deaminase production | 20.4542001  | 19.1470931 | 20.4485896     | 20.7340903 | 13.7356376  | 15.1534794 | 19.678259   | 20.6158577 | 22.3434965  | 25.2639428 |

| AGU                      | Caggiolo    |            | Cervognano  |            | S. Ilario   |            |             |            |
|--------------------------|-------------|------------|-------------|------------|-------------|------------|-------------|------------|
| Vineyard                 | Tiberini    |            | Boscarelli  |            | Bindella    |            | Casanova    |            |
| Ecosystem                | Rhizosphere | Bulk soil  | Rhizosphere | Bulk soil  | Rhizosphere | Bulk soil  | Rhizosphere | Bulk soil  |
| N fixation               | 254.70967   | 244.997058 | 248.1592    | 248.150919 | 278.514379  | 249.270456 | 259.064404  | 224.670145 |
| P solubilization         | 532.123067  | 502.172868 | 553.042669  | 488.304118 | 545.11962   | 468.293636 | 581.538473  | 622.797182 |
| Siderophore production   | 94.4612051  | 119.183709 | 104.591244  | 137.015835 | 120.366355  | 96.079104  | 83.2131811  | 108.087523 |
| IAA production           | 478.426958  | 436.466634 | 524.096431  | 462.368216 | 457.238688  | 405.289537 | 497.46969   | 461.164674 |
| ACC deaminase production | 21.1471873  | 21.6917165 | 20.8084552  | 25.5832629 | 18.9627404  | 17.1426964 | 17.9646773  | 27.108519  |

**Supplementary Table 4 - Metagenome-assembled genomes (MAGs) taxonomically assigned to previous Additional Geographic Unit (AGU)-associated genera. Only MAGs with more than 50% completeness and less than 5% contamination were considered. For each MAG (column 1), the PhyloPhlAn assignment is reported in column 2, the respective 16S taxonomy is reported in column 3, completeness and contamination percentages are reported in column 4 and 5, and bp size is reported in column 6.**

| Genomic bin | PhyloPhlAn assignment                                                                                                                                                                      | 16S taxonomy                    | Completeness % | Contamination n % | Size bp |
|-------------|--------------------------------------------------------------------------------------------------------------------------------------------------------------------------------------------|---------------------------------|----------------|-------------------|---------|
| bin.290     | uSGB_61472:Other:k_Bacteria p_Actinobacteria c_CFGB38726 o_OFGB38726 f_FGB38726 g_GGB44089 s_GGB44089_SGB61472 t_SGB61472:0.247037                                                         | Actinobacteria Unclassified     | 54.47          | 2.91              | 3027411 |
| bin.412     | uSGB_61528:Other:k_Bacteria p_Actinobacteria c_CFGB35837 o_OFGB35837 f_FGB35837 g_GGB44133 s_GGB44133_SGB61528 t_SGB61528:0.250557                                                         | Actinobacteria Unclassified     | 53.09          | 3.02              | 1503685 |
| bin.26      | uSGB_55849:Other:k_Bacteria p_Actinobacteria c_CFGB10712 o_OFGB10712 f_FGB10712 g_GGB32443 s_GGB32443_SGB55849 t_SGB55849:0.265725                                                         | Actinobacteria Unclassified     | 76.83          | 3.51              | 2438761 |
| bin.320     | kSGB_35016:Species:k_Bacteria p_Actinobacteria c_Actinobacteria o_Micrococcales f_Microbacteriaceae g_Agromyces s_Agromyces_ramosus t_SGB35016:0.152843                                    | Agromyces                       | 57.4           | 4.10              | 2789788 |
| bin.340     | kSGB_31955:Species:k_Bacteria p_Proteobacteria c_Alphaproteobacteria o_Rhizobiales f_Bradyrhizobiaceae g_Bradyrhizobium s_Bradyrhizobium_algeriense t_SGB31955:0.26546                     | Bradyrhizobium                  | 96.65          | 1.80              | 4623281 |
| bin.202     | uSGB_49283:Genus:k_Bacteria p_Actinobacteria c_Actinobacteria o_Micrococcales f_Cellulomonadaceae g_Cellulomonas s_Cellulomonas_SGB49283 t_SGB49283:0.312952                               | Cellulomonas                    | 57.18          | 0.78              | 1649748 |
| bin.1       | uSGB_13269:Family:k_Bacteria p_Actinobacteria c_Thermoleophila o_Solirubrobacterales f_Conexibacteraceae g_GGB8534 s_GGB8534_SGB13269 t_SGB13269:0.283502                                  | Conexibacter                    | 61.91          | 1.76              | 5199929 |
| bin.176     | uSGB_13270:Family:k_Bacteria p_Actinobacteria c_Thermoleophila o_Solirubrobacterales f_Conexibacteraceae g_GGB8535 s_GGB8535_SGB13270 t_SGB13270:0.243761                                  | Conexibacter                    | 65.18          | 4.97              | 1715402 |
| bin.348     | uSGB_13270:Family:k_Bacteria p_Actinobacteria c_Thermoleophila o_Solirubrobacterales f_Conexibacteraceae g_GGB8535 s_GGB8535_SGB13270 t_SGB13270:0.192258                                  | Conexibacter                    | 67.54          | 1.71              | 2165037 |
| bin.396     | kSGB_16435:Species:k_Bacteria p_Actinobacteria c_Actinobacteria o_Cryptosporangiales f_Cryptosporangiaceae g_Cryptosporangium s_Cryptosporangium_aurantiacum t_SGB16435:0.276697           | Cryptosporangium                | 52.12          | 0.85              | 1495776 |
| bin.144     | kSGB_33795:Species:k_Bacteria p_Actinobacteria c_Rubrobacteria o_Gaiellales f_Gaiellaceae g_Gaiella s_Gaiella_occulta t_SGB33795:0.256381                                                  | Gaiella                         | 73.59          | 4.78              | 1669372 |
| bin.83      | kSGB_33795:Species:k_Bacteria p_Actinobacteria c_Rubrobacteria o_Gaiellales f_Gaiellaceae g_Gaiella s_Gaiella_occulta t_SGB33795:0.339586                                                  | Gaiella                         | 69.63          | 3.03              | 2860656 |
| bin.228     | kSGB_12835:Species:k_Bacteria p_Proteobacteria c_Betaproteobacteria o_Burkholderiales f_Oxalobacteraceae g_Massilia s_Massilia_yuzhufengensis t_SGB12835:0.35328                           | Massilia                        | 54.81          | 2.81              | 2796737 |
| bin.164     | kSGB_32229:Species:k_Bacteria p_Proteobacteria c_Alphaproteobacteria o_Rhizobiales f_Phyllobacteriaceae g_Mesorhizobium s_Mesorhizobium_sp_YMIC_6_2 t_SGB32229:0.212502                    | Mesorhizobium                   | 59.82          | 3.92              | 5194556 |
| bin.349     | uSGB_61376:Genus:k_Bacteria p_Actinobacteria c_Actinobacteria o_Corynebacteriales f_Mycobacteriaceae g_Mycobacterium s_Mycobacterium_SGB61376 t_SGB61376:0.35328                           | Mycobacterium                   | 98.54          | 0.97              | 2070293 |
| bin.19      | kSGB_853:Species:k_Archaea p_Thaumarchaeota c_Nitrososphaeria o_Nitrososphaerales f_Nitrososphaeraceae g_Nitrososphaera s_Candidatus_Nitrososphaera_gargensis t_SGB853:0.320287            | Archaea                         | 64.29          | 2.76              | 2948997 |
| bin.378     | uSGB_55847:Family:k_Bacteria p_Actinobacteria c_Actinobacteria o_Corynebacteriales f_Nocardiaceae g_GGB38223 s_GGB38223_SGB55847 t_SGB55847:0.265526                                       | Nocardiaceae Unclassified       | 56.04          | 3.61              | 1668073 |
| bin.111     | kSGB_34149:Species:k_Bacteria p_Actinobacteria c_Actinobacteria o_Propionibacteriales f_Nocardioidaceae g_Nocardioides s_Nocardioides_iriomotensis t_SGB34149:0.26546                      | Nocardioides                    | 77.70          | 4.37              | 1248512 |
| bin.197     | kSGB_55752:Species:k_Bacteria p_Actinobacteria c_Actinobacteria o_Propionibacteriales f_Nocardioidaceae g_Nocardioides s_Nocardioides_bacterium t_SGB55752:0.300994                        | Nocardioides                    | 51.66          | 2.59              | 1740489 |
| bin.92      | kSGB_15965:Species:k_Bacteria p_Actinobacteria c_Actinobacteria o_Propionibacteriales f_Nocardioidaceae g_Nocardioides s_Nocardioides_sp_Root122 t_SGB15965:0.254359                       | Nocardioides                    | 57.42          | 4.42              | 2834555 |
| bin.278     | kSGB_11537:Species:k_Bacteria p_Proteobacteria c_Alphaproteobacteria o_Sphingomonadales f_Sphingomonadaceae g_Novosphingobium s_Novosphingobium_sp_Rr_2_17 t_SGB11537:0.193331             | Novosphingobium                 | 57.43          | 4.67              | 2453724 |
| bin.307     | kSGB_16407:Species:k_Bacteria p_Actinobacteria c_Actinobacteria o_Streptosporangiales f_Thermomonosporaceae g_Thermomonospora s_Thermomonospora_curvata t_SGB16407:0.328965                | Novosphingobium/Thermomonospora | 52.49          | 2.58              | 2643601 |
| bin.321     | uSGB_55819:Family:k_Bacteria p_Cyanobacteria c_Cyanobacteria_unclassified o_Synechococcales f_Prochloraceae g_GGB41164 s_GGB41164_SGB55819 t_SGB55819:0.248764                             | Synechococcales Unclassified    | 83.49          | 2.91              | 2104713 |
| bin.325     | uSGB_61813:Other:k_Bacteria p_Proteobacteria c_CFGB35932 o_OFGB35932 f_FGB35932 g_GGB44394 s_GGB44394_SGB61813 t_SGB61813:0.273629                                                         | Proteobacteria Unclassified     | 62.1           | 4.73              | 2190116 |
| bin.96      | uSGB_61813:Other:k_Bacteria p_Proteobacteria c_CFGB35932 o_OFGB35932 f_FGB35932 g_GGB44394 s_GGB44394_SGB61813 t_SGB61813:0.26803                                                          | Proteobacteria Unclassified     | 62.22          | 1.03              | 1350259 |
| bin.128     | kSGB_67219:Species:k_Bacteria p_Proteobacteria c_Alphaproteobacteria o_Rhodobacterales f_Rhodobacteraceae g_Rhodobacteraceae_unclassified s_Rhodobacteraceae_bacterium t_SGB67219:0.372583 | Rhodobacter                     | 52.21          | 2.04              | 1857802 |
| bin.355     | uSGB_52610:Genus:k_Bacteria p_Actinobacteria c_Actinobacteria o_Micrococcales f_Microbacteriaceae g_Rhodoluna s_Rhodoluna_SGB52610 t_SGB52610:0.300994                                     | Microbacteriaceae               | 74.22          | 3.53              | 2002286 |
| bin.121     | kSGB_17577:Species:k_Bacteria p_Actinobacteria c_Rubrobacteria o_Rubrobacterales f_Rubrobacteraceae g_Rubrobacter s_Rubrobacter_xylanophilus t_SGB17577:0.300994                           | Rubrobacter                     | 54.39          | 0.50              | 1851211 |
| bin.36      | kSGB_17577:Species:k_Bacteria p_Actinobacteria c_Rubrobacteria o_Rubrobacterales f_Rubrobacteraceae g_Rubrobacter s_Rubrobacter_xylanophilus t_SGB17577:0.258493                           | Rubrobacter                     | 60.04          | 3.45              | 3175285 |
| bin.178     | kSGB_55872:Species:k_Bacteria p_Actinobacteria c_Thermoleophila o_Solirubrobacterales f_Solirubrobacteraceae g_Solirubrobacter s_Solirubrobacter_sp_CPCC_204708 t_SGB55872:0.295981        | Solirubrobacter                 | 74.11          | 1.94              | 1593893 |
| bin.119     | kSGB_24610:Species:k_Bacteria p_Proteobacteria c_Alphaproteobacteria o_Sphingomonadales f_Sphingomonadaceae g_Sphingomonas s_Sphingomonas_sp_URHD0007 t_SGB24610:0.35328                   | Sphingomonas                    | 66.50          | 3.23              | 2636012 |
| bin.123     | kSGB_10471:Species:k_Bacteria p_Proteobacteria c_Gammaproteobacteria o_Nevskiales f_Sinobacteraceae g_Steroidobacter s_Steroidobacter_denitrificans t_SGB10471:0.295981                    | Steroidobacter                  | 78.95          | 3.41              | 2177673 |
| bin.42      | kSGB_10471:Species:k_Bacteria p_Proteobacteria c_Gammaproteobacteria o_Nevskiales f_Sinobacteraceae g_Steroidobacter s_Steroidobacter_denitrificans t_SGB10471:0.312952                    | Steroidobacter                  | 74.23          | 4.68              | 3459230 |
| bin.126     | kSGB_16111:Species:k_Bacteria p_Actinobacteria c_Actinobacteria o_Streptomycetales f_Streptomycetaceae g_Streptomyces s_Streptomyces_sp_1114_5 t_SGB16111:0.270747                         | Streptomyces                    | 68.45          | 3.45              | 3676162 |
| bin.173     | kSGB_34439:Species:k_Bacteria p_Actinobacteria c_Actinobacteria o_Streptomycetales f_Streptomycetaceae g_Streptomyces s_Streptomyces_sp_TAA040 t_SGB34439:0.320287                         | Streptomyces                    | 63.88          | 4.34              | 2875784 |
| bin.43      | uSGB_46364:Genus:k_Bacteria p_Actinobacteria c_Actinobacteria o_Streptomycetales f_Streptomycetaceae g_Streptomyces s_Streptomyces_SGB46364 t_SGB46364:0.35328                             | Streptomyces                    | 78.38          | 3.39              | 2183585 |
| bin.276     | kSGB_12768:Species:k_Bacteria p_Proteobacteria c_Betaproteobacteria o_Burkholderiales f_Comamonadaceae g_Variovorax s_Variovorax_sp_YR216 t_SGB12768:0.320287                              | Variovorax                      | 66.22          | 4.88              | 2533478 |



**Supplementary Table 6 - Accession numbers of plant growth-promoting (PGP) proteins from the NCBI database.**

Protein names are given in the first column.

| Protein ID | NCBI accession |
|------------|----------------|
| NifB       | WP_011024080   |
| NifE       | WP_014404757   |
| NifH       | WP_010870393   |
| NifN       | WP_011241560   |
| NifV       | WP_011241567   |
| NifU       | NP_461477      |
| phoA       | NP_414917      |
| GDH        | NP_388275      |
| EntF       | WP_000077784   |
| EntS       | NP_415123      |
| FslA       | WP_003037766   |
| ipdC       | WP_035671558   |
| aro10      | NP_010668      |
| aldH       | NP_001260290   |
| AcdS       | XP_037178185   |
