# Supplementary material for: Zonation of the Vitis vinifera microbiome in Vino Nobile di Montepulciano PDO production area
Source: PubMed Central journal article supplement (PMC11628622; doi:10.1038/s42003-024-07261-8), 2024-12-09
Supplement: 42003_2024_7261_MOESM2_ESM.pdf [file 42003_2024_7261_MOESM2_ESM.pdf]

## **Description of Additional Supplementary Files**

File name: Supplementary Data 1

Description: The source data for Figure 3 in the paper. Excel sheet “Fig\_3A\_data” refers to the panel A of Figure 3, “Fig\_3B\_data” refers to panel B of Figure 3
